# Supplementary material for: Decreased surface defects and non-radiative recombination via the passivation of the halide perovskite film by 2-thiophenecarboxylic acid in triple-cation perovskite solar cells
Source: Royal Society of Chemistry journal article supplement (doi:10.1039/d2cp00341d), 2022-01-01
Supplement: d2cp00341d1.pdf [file d2cp00341d1.pdf]

## Supporting information

### Decreased surface defects and non-radiative recombination via passivation of halide perovskite film by 2-Thiophenecarboxylic acid in triple-cation perovskite solar cells

*Duygu Akın Kara\*†, Dilek cirak†, Burak Gultekin\*†.*

Solar Energy Institute, Ege University, 35000, Izmir, Turkey.

KEYWORDS perovskite, solar cell, defect passivation, recombination, long-term stability

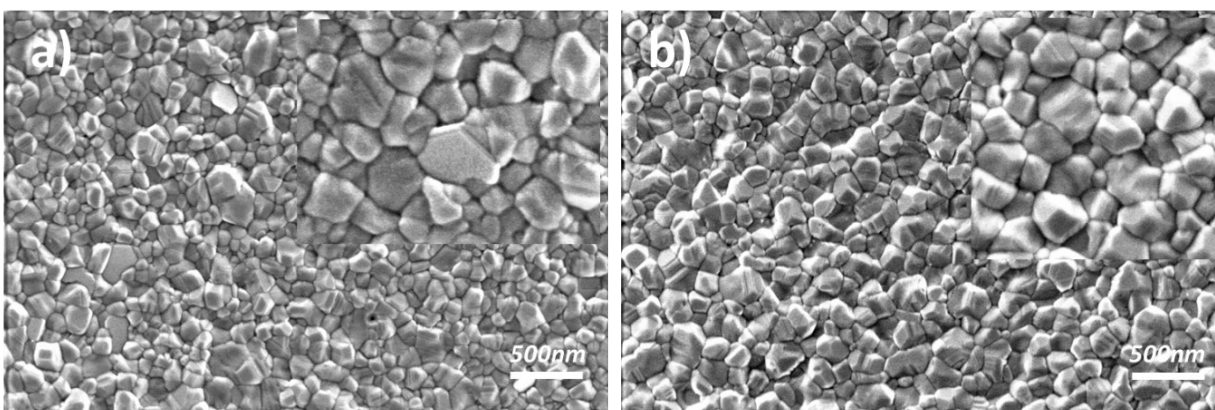

**Figure S1.** SEM images of without (a) and with 2TiCOOH (b) passivation of perovskite layer.

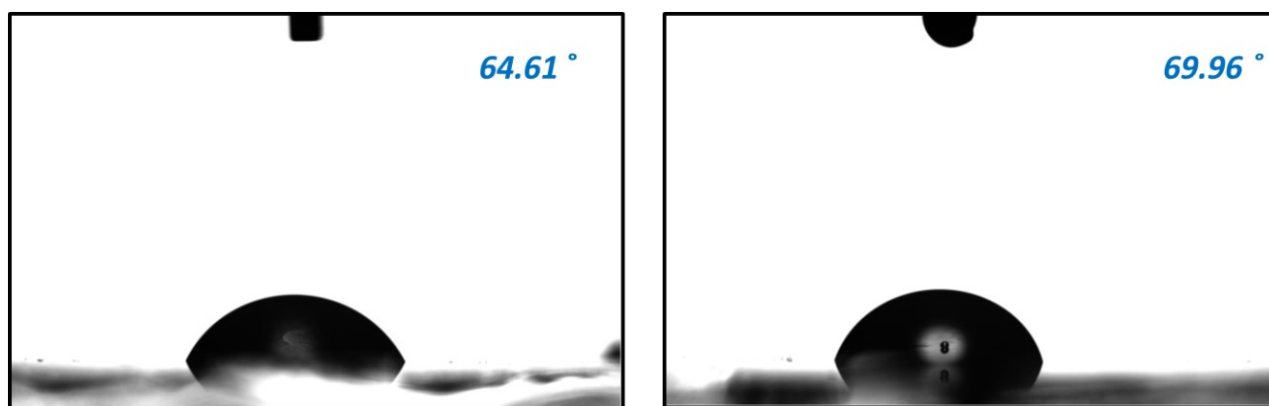

**Figure S2.** Contact angle measurements of without (a) and with 2TiCOOH (b) passivation of perovskite layer.

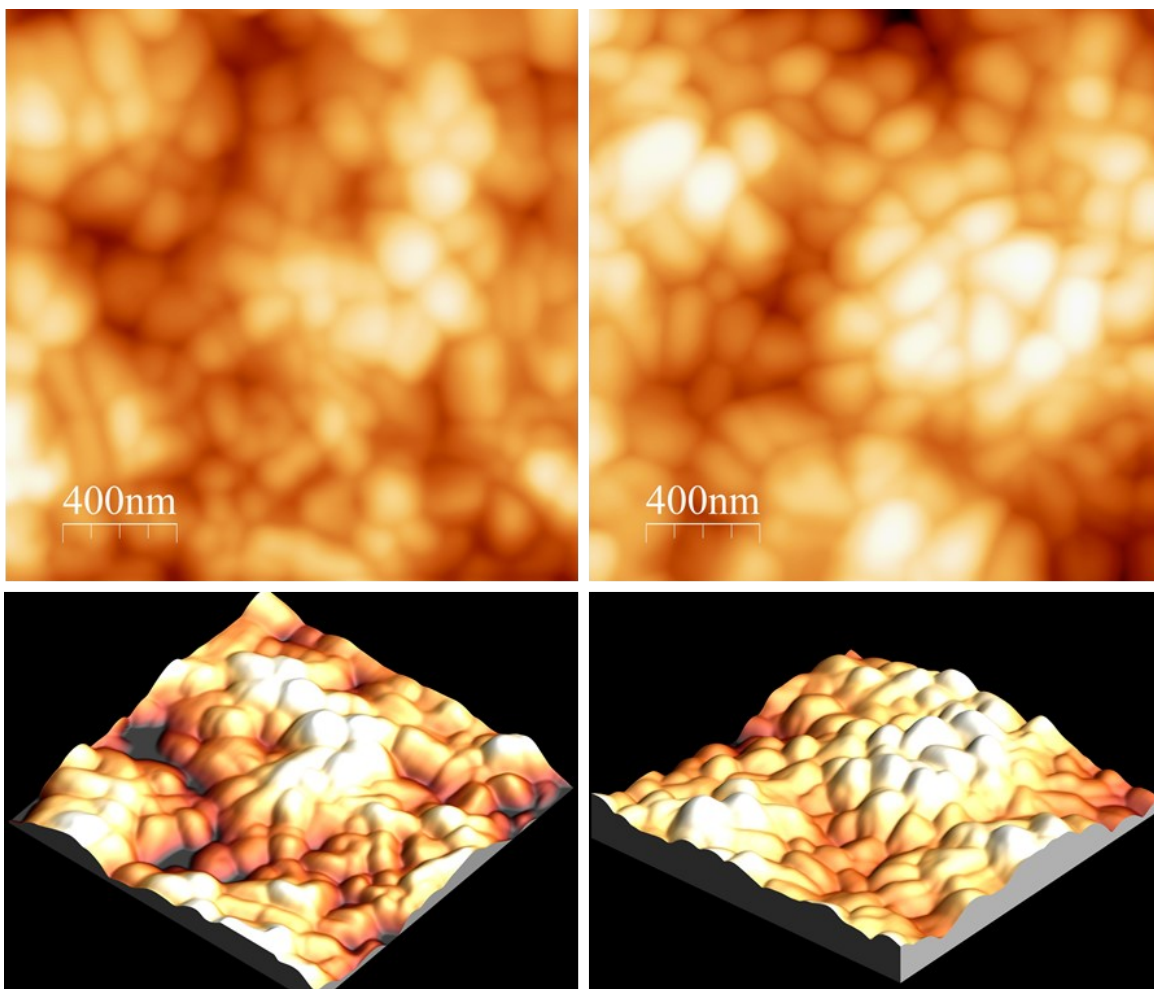

**Figure S3.** AFM image of without (a) and with  $2\text{TiCOOH}$  (b) passivation of perovskite layer

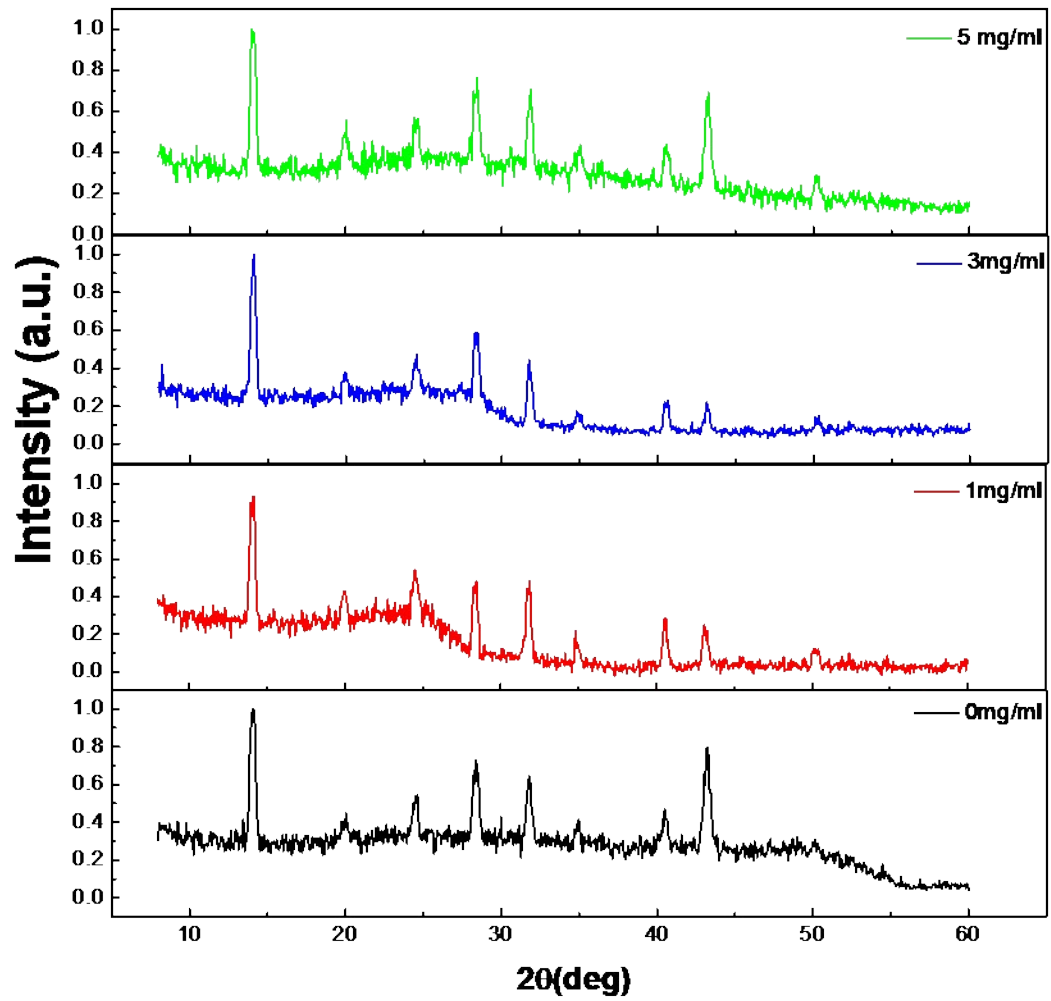

Figure S4. XRD results of without and with 2TiCOOH passivation of perovskite film.

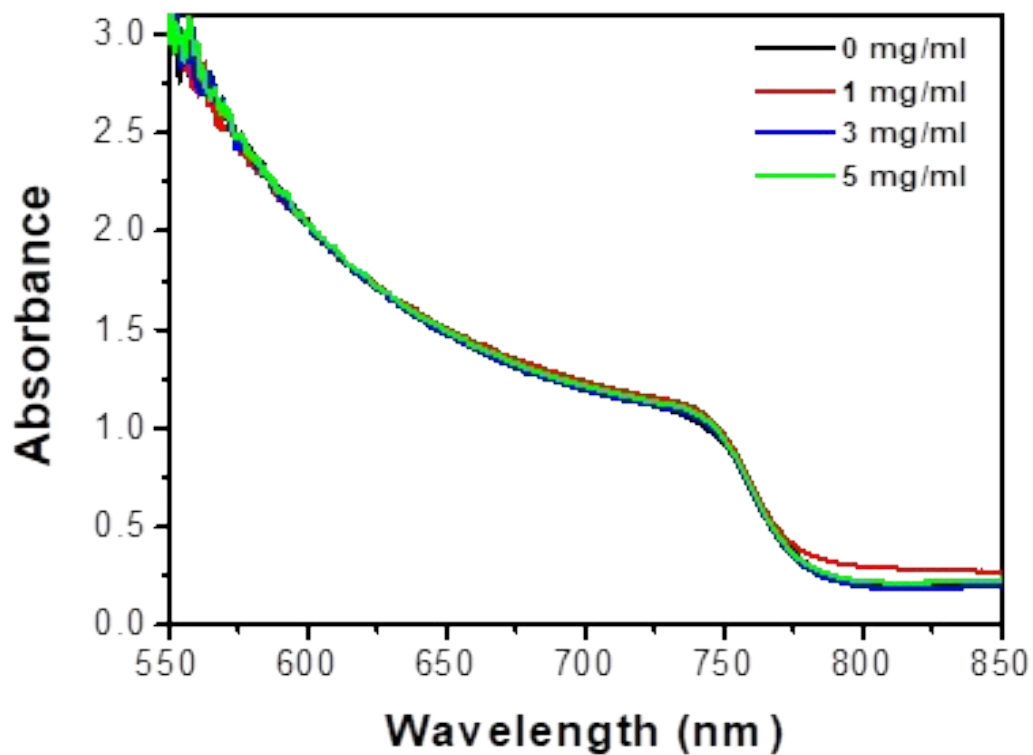

**Figure S5.** Uv-vis spectra of without and with 2TiCOOH passivation of perovskite film

**Table S1.** Dark current density voltage device parameters of perovskite solar cells without and with 2TiCOOH passivation.

|                | <b>Jo (mA/cm<sup>2</sup>)</b> | <b>n</b>    |
|----------------|-------------------------------|-------------|
| <b>0 mg/ml</b> | <b>9.96x10<sup>-7</sup></b>   | <b>1.85</b> |
| <b>3 mg/ml</b> | <b>8.24x10<sup>-8</sup></b>   | <b>1.58</b> |

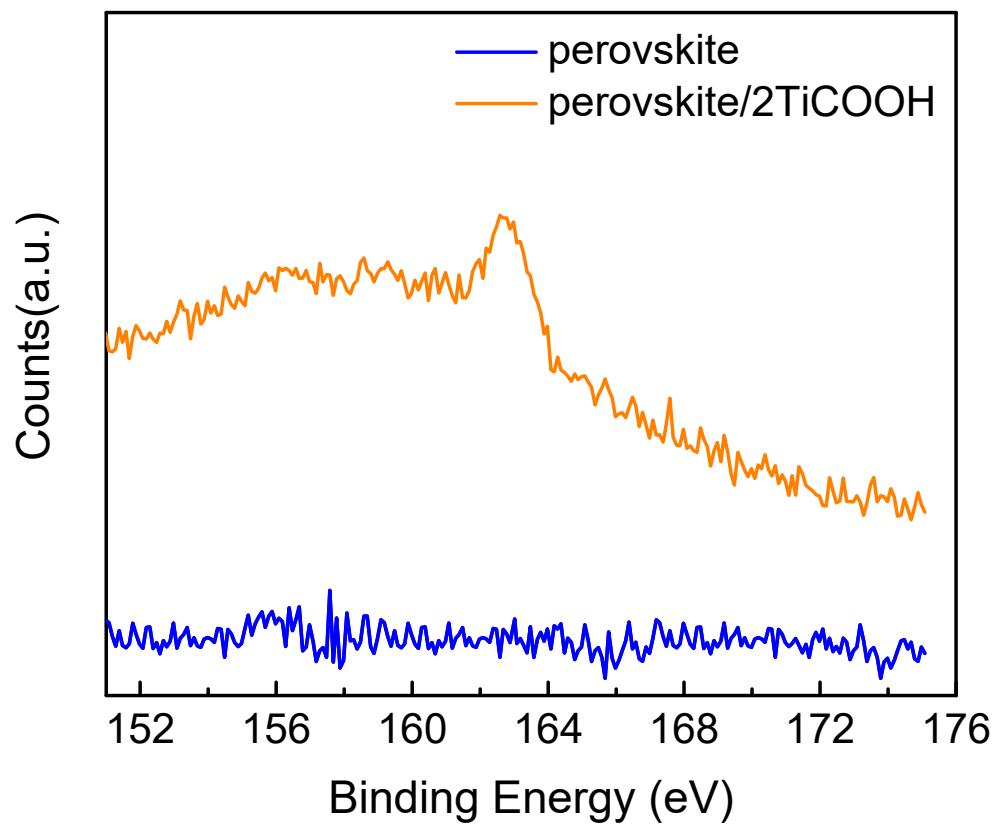

**Figure S6.** XPS results of S 2p peaks derived from 2TiCOOH passivated and control perovskite films.

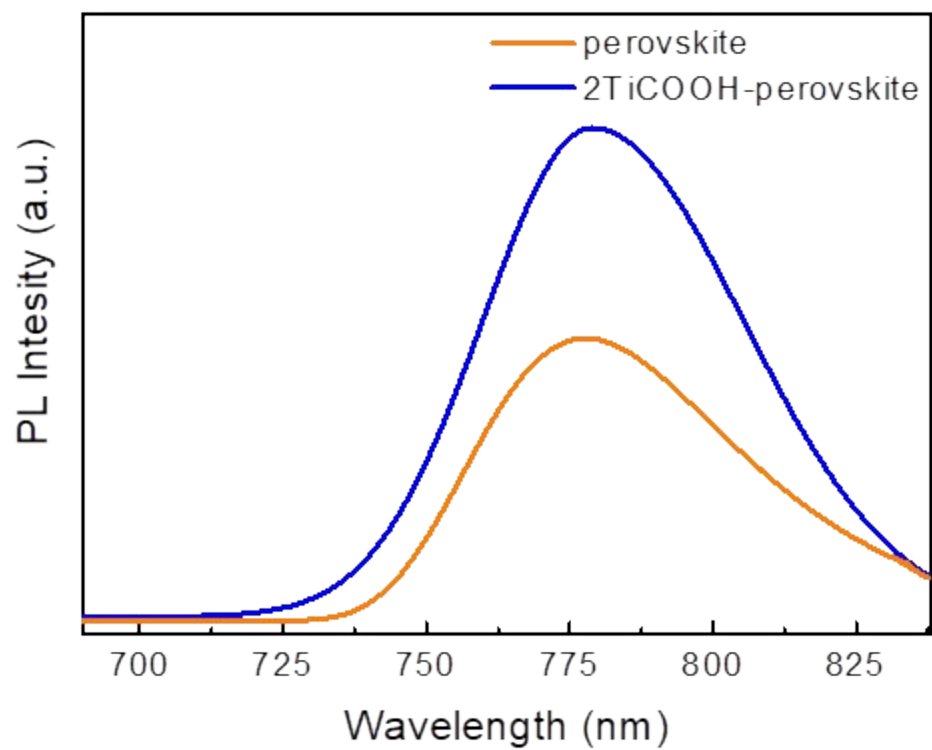

**Figure S7.** Steady-state PL decay of glass/perovskite and glass/perovskite/2TiCOOH films.
